# Supplementary material
Source: publisher site journal article supplement (https://www.dovepress.com/article/471827)
Supplement: Supplementary file 1 [file get_supplementary_file.php]

**Supplemental Material**

Table S1. Summary of Medline and Embase search strategy and results. Search conducted on 25 January 2024.

| Count | Search term | Citations found |
| --- | --- | --- |
| 1 | (cost effectiveness analys#s or cost-effectiveness analys#s).ti,ab,kf. | 41978 |
| 2 | (cost utility analys#s or cost-utility analys#s).ti,ab,kf. | 10977 |
| 3 | economic evaluation.ti,ab. | 29022 |
| 4 | ("incremental cost-effectiveness ratio" or "ICER").ti,ab. | 29039 |
| 5 | ("CEA" or "CUA").ti,ab. | 72789 |
| 6 | 1 or 2 or 3 or 4 or 5 | 156255 |
| 7 | (equit* or inequitable or distributi* or inequality or unequal).ti,ab. | 2563928 |
| 8 | 6 and 7 | 6093 |
| 9 | ("systematic review" or "systematic literature review").ti,ab. | 662856 |
| 10 | 8 and 9 | 283 |
| 11 | remove duplicates from 10 | 181 |
| 12 | limit 11 to English language | 178 |
| 13 | limit 12 to last 10 years | 129 |
